# Supplementary material for: A RhNiP/rGO hybrid for efficient catalytic hydrogen generation from an alkaline solution of hydrazine
Source: Royal Society of Chemistry journal article supplement (doi:10.1039/c6ta05917a), 2016-01-01
Supplement: c6ta05917a1.pdf [file c6ta05917a1.pdf]

## Supporting Information

### **A RhNiP/rGO hybrid for efficient catalytic hydrogen generation from alkaline solution of hydrazine**

Xiaoqiong Du, Shiyi Tan, Ping Cai, Wei Luo\* and Gongzhen Cheng

College of Chemistry and Molecular Sciences, Wuhan University, Wuhan, Hubei 430072, P.

R. China, Tel.: +86-27-68752366

\*Corresponding author. *E-mail addresses:* [wluo@whu.edu.cn](mailto:wluo@whu.edu.cn).

### ***Experimental Section***

**Chemicals and materials:** All chemicals were commercial and used without further purification. Nickel chloride hexahydrate ( $\text{NiCl}_2 \cdot 6\text{H}_2\text{O}$ , Sinopharm Chemical Reagent Co., Ltd.,  $\geq 99\%$ ), Rhodium chloride hydrate ( $\text{RhCl}_3 \cdot 3\text{H}_2\text{O}$ , Wuhan Greatwall Chemical Co., Ltd.,  $>99\%$ ), hydrazine monohydrate ( $\text{N}_2\text{H}_4 \cdot \text{H}_2\text{O}$ , TCI Shanghai Co., Ltd.,  $>98\%$ ), sodium hypophosphite ( $\text{NaH}_2\text{PO}_2$ , Aladdin Co., Ltd.,  $>99\%$ ), sodium borohydride ( $\text{NaBH}_4$ , Sinopharm Chemical Reagent Co., Ltd.,  $>96\%$ ), potassium permanganate ( $\text{KMnO}_4$ , Shanghai Chemic Co., Ltd.,  $\geq 99.5\%$ ), hydrogen peroxide ( $\text{H}_2\text{O}_2$ , Sinopharm Chemical Reagent Co., Ltd.,  $\geq 30\%$ ), phosphoric acid ( $\text{H}_3\text{PO}_4$ , Sinopharm Chemical Reagent Co., Ltd, AR), sulfuric acid ( $\text{H}_2\text{SO}_4$ , Sinopharm Chemical Reagent Co., Ltd, 95~98%), graphite power (Sinopharm Chemical Reagent Co., Ltd,  $\geq 99.85\%$ ) were used as received. Ultrapure water was used as the reaction solvent.

**Preparation of RhNiP/rGO catalysts:** GO (Graphene oxide) was prepared according to the modified Hummers method [ *ACS Nano*, 2010, **4**, 4806]. In a typical experiment, 10 mg GO and different amounts of  $\text{NaH}_2\text{PO}_2$  (0 mmol, 0.1 mmol, 0.2 mmol, 0.3 mmol and 0.4 mmol) were dispersed in 2 mL of water kept in a two-necked round-bottom flask. Ultrasonication was required to get a uniform dispersion. 0.8 mL rhodium chloride solution ( $0.1 \text{ mol L}^{-1}$ ) and 0.2

mL nickel chloride solution (0.1 mol L<sup>-1</sup>) was added into the flask. The resulting mixture was then reduced by 2 mL of aqueous solution containing 37.8mg NaBH<sub>4</sub> and a certain amount of NaOH with vigorous stirring at 298 K. The process of hydrogen generation from alkaline solution of hydrazine is carried at 323 K. One neck was connected to a gas burette to monitor the volume of the gas evolution, and the other for the introduction of hydrazine monohydrate (0.1 mL, 1.96 mmol). A water bath was used to control the temperature of the reaction solution at 298 K. The gas released during the reaction was passed through HCl solution (1.0 M) before it was measured volumetrically. The selectivity towards H<sub>2</sub> generation (X) can be calculated using Equation S1. The value of turnover frequency (TOF) can be calculated using Equation S2.

$$X = (3\lambda - 1) / 8 \quad [\lambda = n(\text{H}_2 + \text{N}_2) / n(\text{H}_2\text{NNH}_2)] \quad \text{S1}$$

$$\text{TOF}_{\text{initial}} = \frac{P_{\text{atm}} V_{\text{H}_2} / RT}{n_{\text{Rh+Ni}} t} \quad \text{S2}$$

Where TOF<sub>initial</sub> is initial turnover frequency, P<sub>atm</sub> is the atmospheric pressure, V<sub>H<sub>2</sub></sub> is the volume of the generated gas when the conversion reached 50%, R is the universal gas constant, T is room temperature (298 K), n<sub>Rh+Ni</sub> is the mole amount of Rh and Ni, and t is the reaction time.

The relative molar quantities of RhCl<sub>3</sub>, NiCl<sub>2</sub> and NaH<sub>2</sub>PO<sub>2</sub> were adjusted in this study, which are summarized in Table S1. The temperatures were varied from 298 to 323 K, to obtain the activation energy (E<sub>a</sub>) (metal/N<sub>2</sub>H<sub>4</sub>•H<sub>2</sub>O = 0.05).

**Physical characterizations:** Powder X-ray diffraction (XRD) patterns were measured by a Bruker D8-Advance X-ray diffractometer using Cu K $\alpha$  radiation source ( $\lambda = 0.154178$  nm) with a velocity of 10° min<sup>-1</sup>. Raman spectroscopy was performed with a laser micro-Raman spectrometer (Renishaw inVia, Renishaw, 532 nm excitation wavelength). The morphologies and sizes of the samples were observed by using a Tecnai G20 U-Twin transmission electron microscope (TEM) at an acceleration voltage of 200 kV and a Titan G2 60-300 Titan Probe

corrected TEM equipped with an energy dispersive X-ray detector (EDX) at an acceleration voltage of 300 kV. X-ray photoelectron spectroscopy (XPS) measurement was performed with a Thermo Fischer ESCALAB 250Xi spectrophotometer. MS of the generated gases were collected by using an Ametek Dycor mass spectrometer under Ar atmosphere. Inductively coupled plasma-atomic emission spectroscopy (ICP-AES) was performed on IRIS Intrepid II XSP. Atomic Force Microscope (AFM) images were recorded in NT-MDT system via semicontact mode. The characterization of Brunauer–Emmett–Teller (BET) surface data, which was based on N<sub>2</sub> adsorption/desorption isotherms at 77 K and controlled by liquid nitrogen, was measured using a Quantachrome NOVA 4200e.

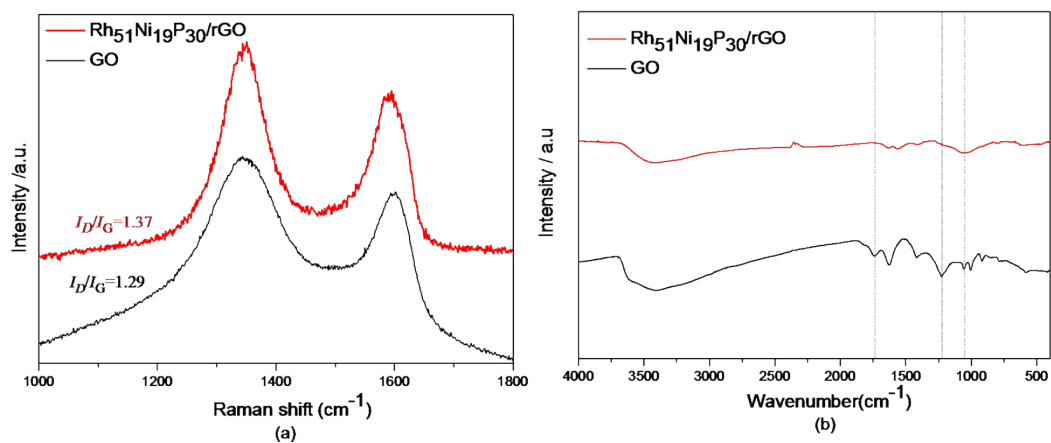

Fig. S1 (a) Raman and (b) FTIR spectra of GO and Rh<sub>51</sub>Ni<sub>19</sub>P<sub>30</sub>/rGO.

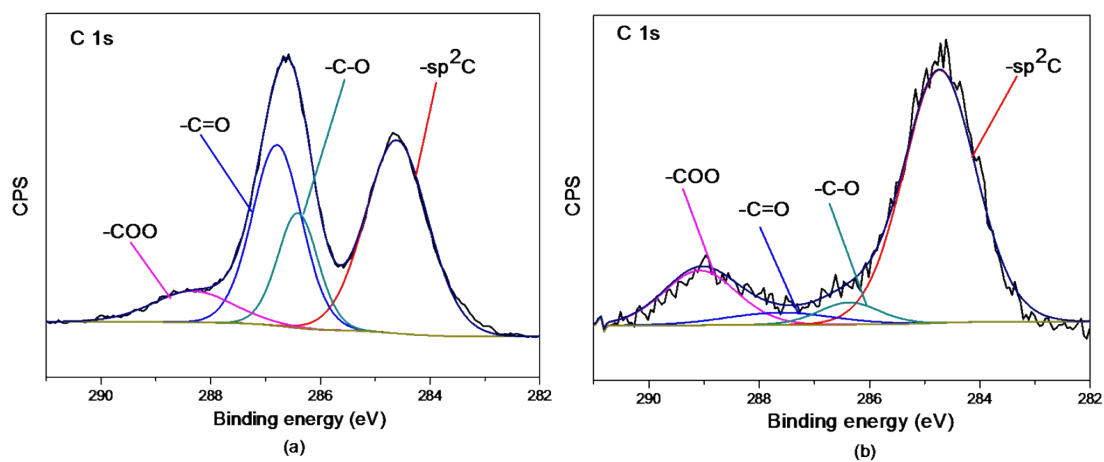

Fig. S2 XPS spectrum of C 1s for (a) GO and (b) Rh<sub>51</sub>Ni<sub>19</sub>P<sub>30</sub>/rGO.

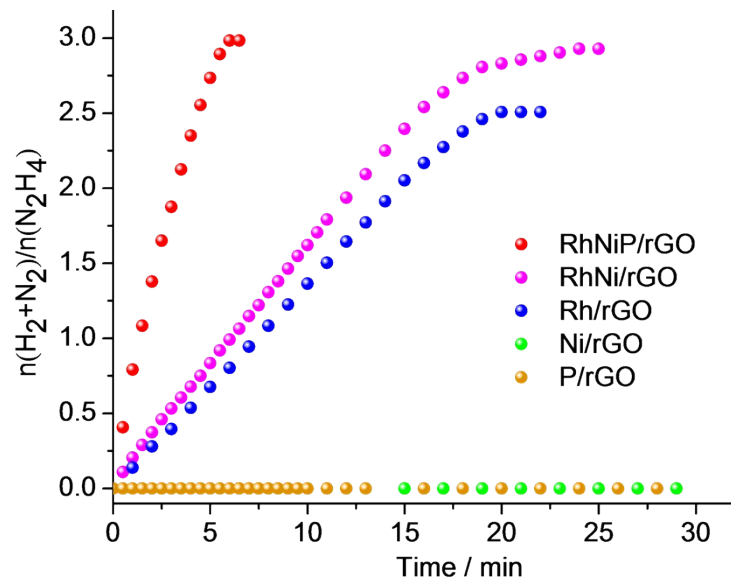

**Fig. S3** Time course plots for hydrogen generation from hydrazine by RhNiP/rGO, RhNi/rGO, Rh/rGO, Ni/rGO and P/rGO at 323K.

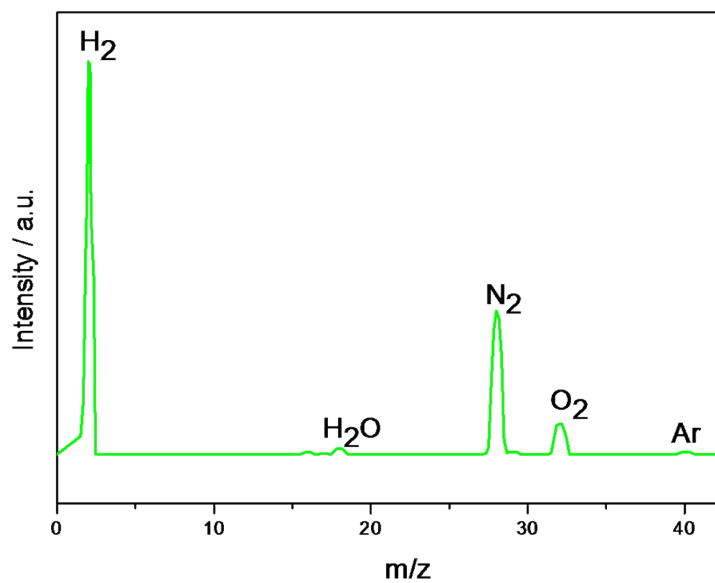

**Fig. S4** Mass spectra profile of the gases released from the decomposition of hydrazine over Rh<sub>51</sub>Ni<sub>19</sub>P<sub>30</sub>/rGO under an argon atmosphere at 323 K.

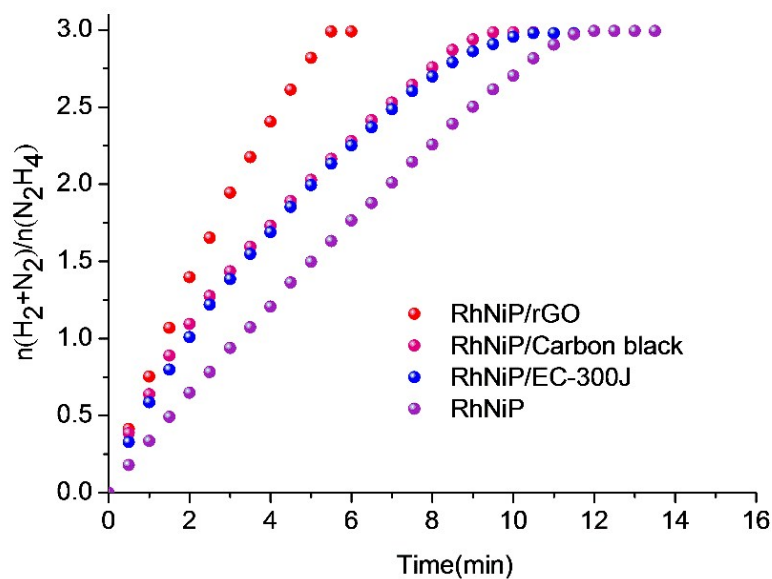

**Fig. S5** Time course plots for hydrogen generation from hydrazine by  $\text{Rh}_{51}\text{Ni}_{19}\text{P}_{30}$  supported on rGO, carbon black, EC-300J and no support at 323K.

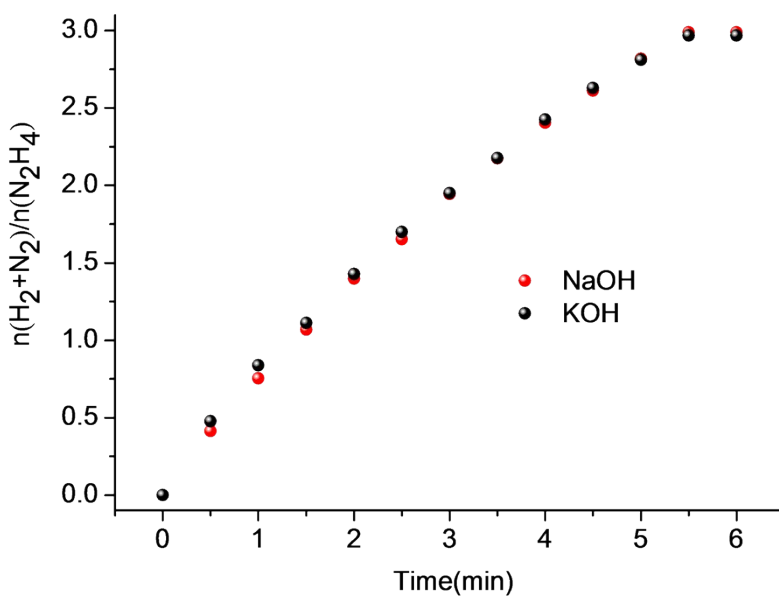

**Fig. S6** Catalytic performance for hydrogen generation from alkaline solution of hydrazine catalyzed by  $\text{Rh}_{51}\text{Ni}_{19}\text{P}_{30}/\text{rGO}$  in aqueous NaOH or KOH solution.

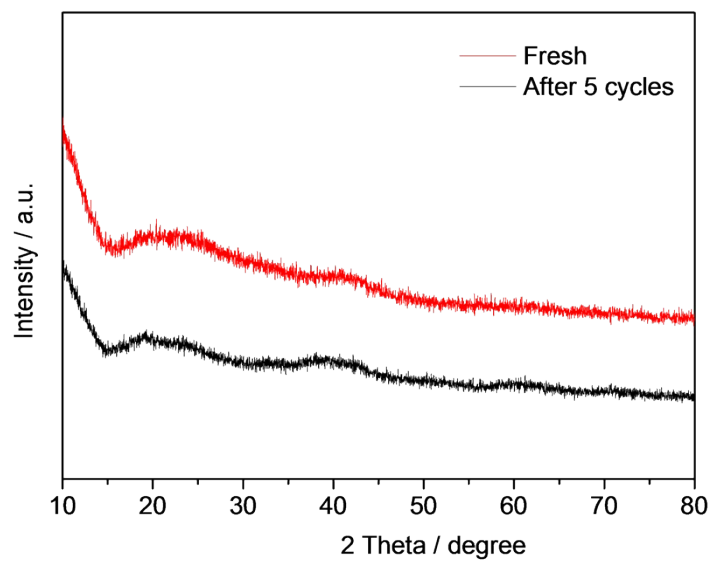

**Fig. S7** Powder XRD patterns of the  $\text{Rh}_{51}\text{Ni}_{19}\text{P}_{30}/\text{rGO}$  for fresh (red) and after 5 cycles (black).

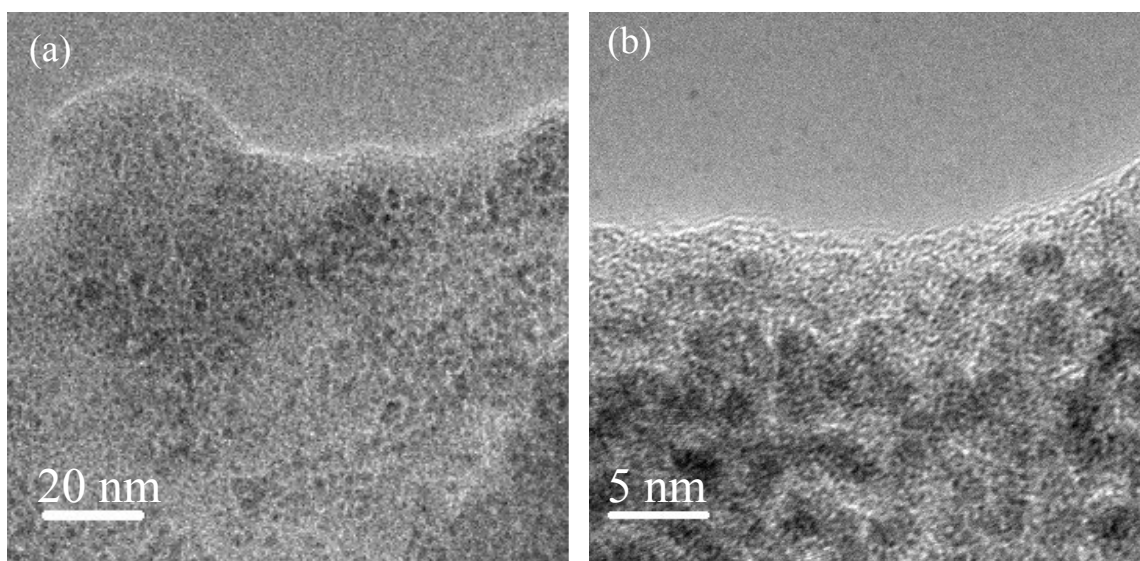

**Fig. S8** TEM images of with different magnifications (a and b) of  $\text{Rh}_{51}\text{Ni}_{19}\text{P}_{30}/\text{rGO}$  after 5 cycles for a period of time.

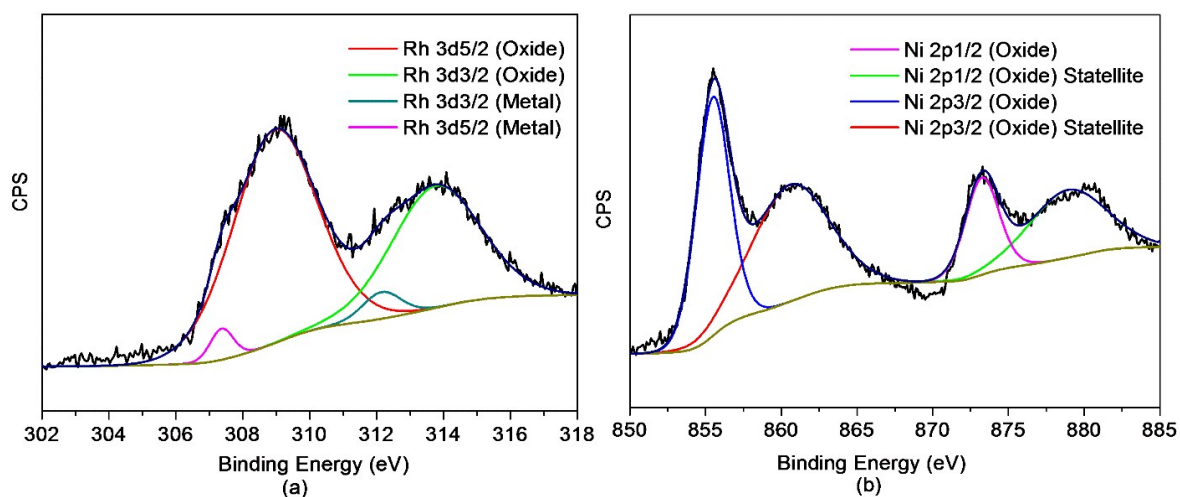

**Fig. S9** XPS spectra of the (a) Rh 3d and (b) Ni 2p for  $\text{Rh}_{51}\text{Ni}_{19}\text{P}_{30}/\text{rGO}$  after 5 cycles for a period of time.

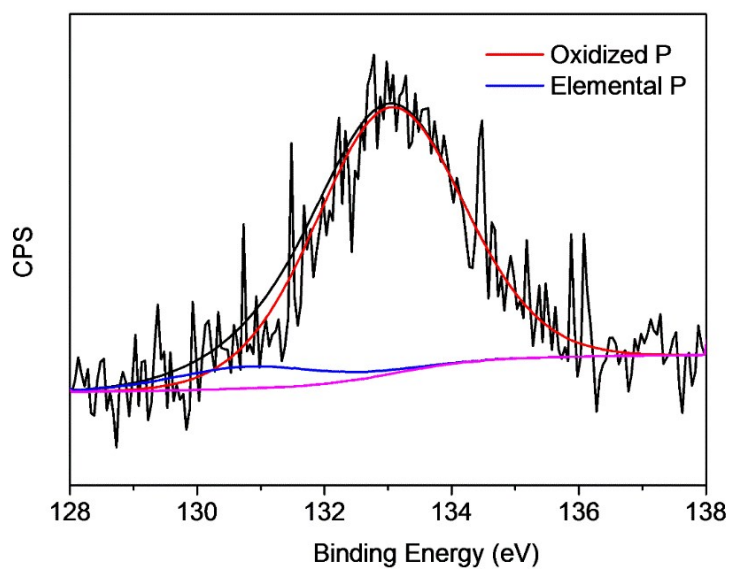

**Fig. S10** XPS spectra of the P 2p for  $\text{Rh}_{51}\text{Ni}_{19}\text{P}_{30}/\text{rGO}$  after 5 cycles for a period of time.



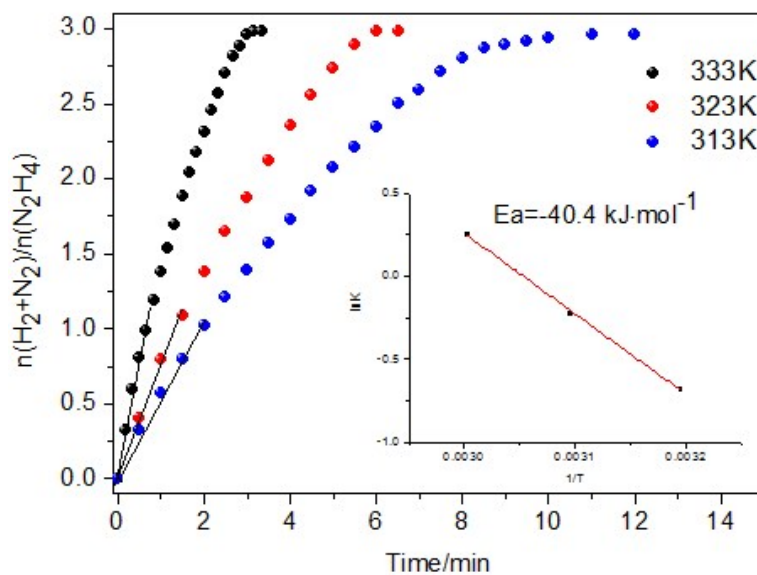

**Fig. S11** Time plots for hydrogen generation from alkaline solution of hydrazine catalyzed by  $\text{Rh}_{51}\text{Ni}_{19}\text{P}_{30}/\text{rGO}$  at higher temperature (333K-313K) and Arrhenius plot of  $\ln k$  versus  $1/T$  during the hydrazine decomposition over  $\text{Rh}_{51}\text{Ni}_{19}\text{P}_{30}/\text{rGO}$  (inset).

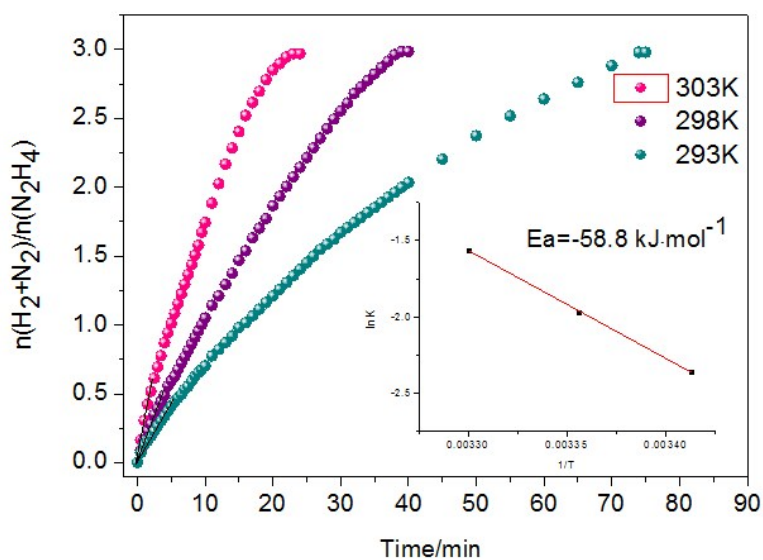

**Fig. S12 (a)** Time course plots for hydrogen generation from alkaline solution of hydrazine catalyzed by  $\text{Rh}_{51}\text{Ni}_{19}\text{P}_{30}/\text{rGO}$  at lower temperature (313K-293K) and Arrhenius plot of  $\ln k$  versus  $1/T$  during the hydrazine decomposition over  $\text{Rh}_{51}\text{Ni}_{19}\text{P}_{30}/\text{rGO}$  (inset).

It has been reported that hydrazine decomposition ( $\text{H}_2\text{NNH}_2 \rightarrow \text{N}_2(\text{g}) + 2\text{H}_2(\text{g})$ ) may proceed through different pathways and it was related to the reaction condition including reaction temperature. In one pathway,  $\text{N}_2$  is formed intra-molecularly and not by the recombination of nitrogen species [Equation (1-5)]. (H.-L. Jiang, S. K. Singh, J.-M. Yan, X.-B. Zhang, and Q. Xu, *ChemSusChem*, 2010, **3**, 541.)

**Pathway 1:**

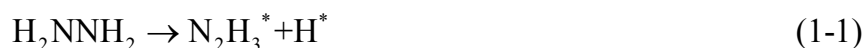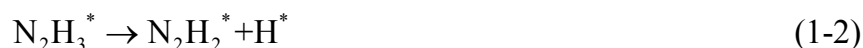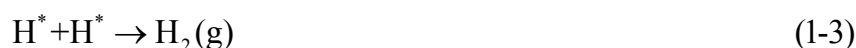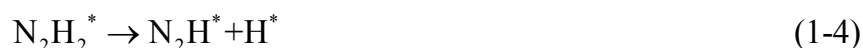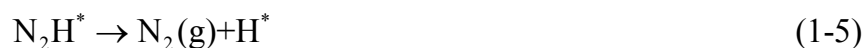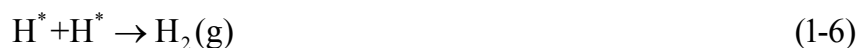

In second pathway, firstly the N-N bond breaks to form the  $\text{NH}_2$  species on the surface [Equation (2-1)], which further decomposes to nitrogen and hydrogen [Equation (2-3) and (2-4)]. It has been reported that activity energy ( $E_a$ ) for one pathway is always smaller than  $E_a$  for second pathway. (Medeiros, J. E., and Valenca, G. P., Brazilian, *J. Chem. Eng.* 1998, **15**, 126.)

**Pathway 2:**

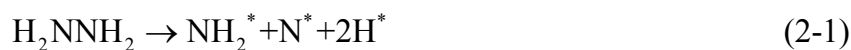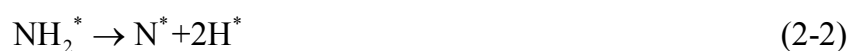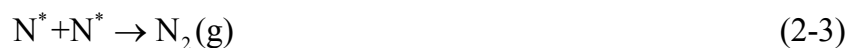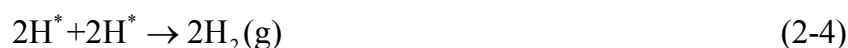

At higher temperatures, the value of  $E_a$  is  $40.4 \text{ kJ}\cdot\text{mol}^{-1}$ , which indicating that the main pathway of hydrazine decomposition is one pathway. At lower temperatures, the value of  $E_a$  is  $58.5 \text{ kJ}\cdot\text{mol}^{-1}$ , which indicating that the second pathway of hydrazine decomposition is increasing. This the reason for  $\text{H}_2$  evolution plots at higher temperatures is slightly faster than that at lower temperatures.

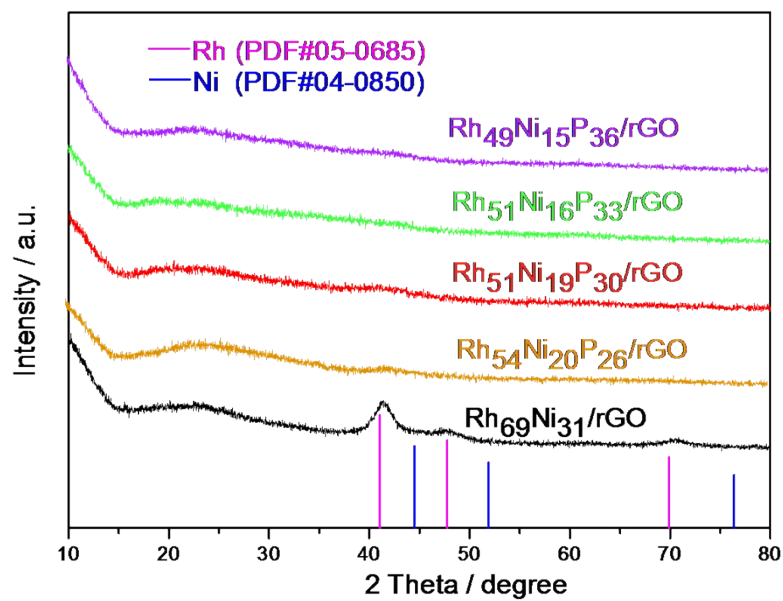

**Fig. S13** Powder XRD patterns of the obtained Rh<sub>69</sub>Ni<sub>31</sub>/rGO, Rh<sub>54</sub>Ni<sub>20</sub>P<sub>26</sub>/rGO, Rh<sub>51</sub>Ni<sub>19</sub>P<sub>30</sub>/rGO, Rh<sub>51</sub>Ni<sub>16</sub>P<sub>33</sub>/rGO and Rh<sub>49</sub>Ni<sub>15</sub>P<sub>36</sub>/rGO.

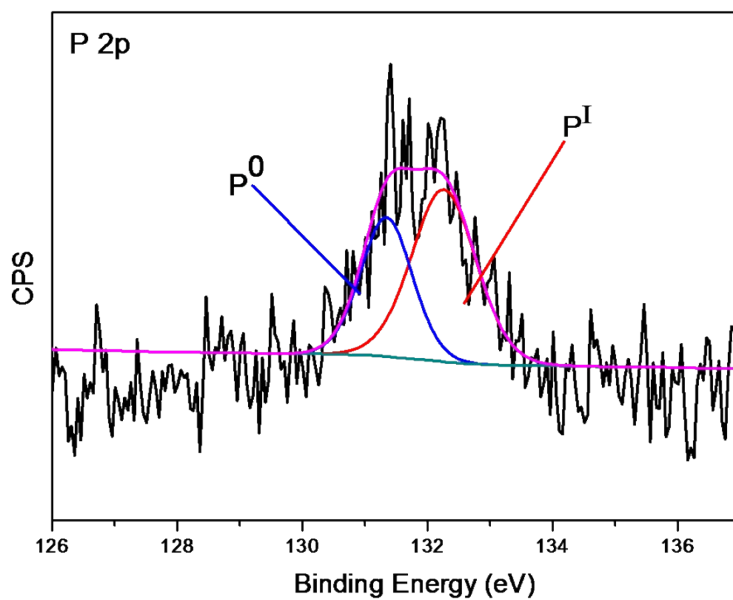

**Fig. S14** XPS spectrum of the P 2p for Rh<sub>51</sub>Ni<sub>19</sub>P<sub>30</sub>/rGO.

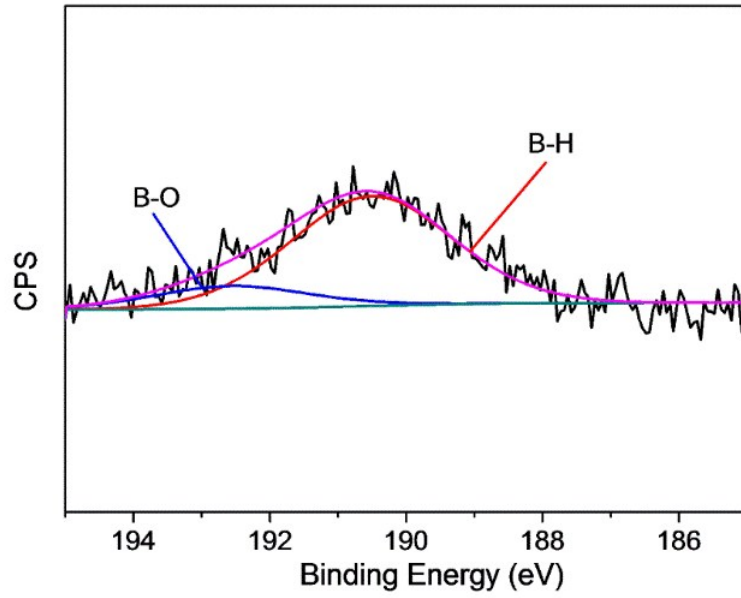

**Fig. S15** B 1s XPS spectra of Rh<sub>51</sub>Ni<sub>19</sub>P<sub>30</sub>/rGO.

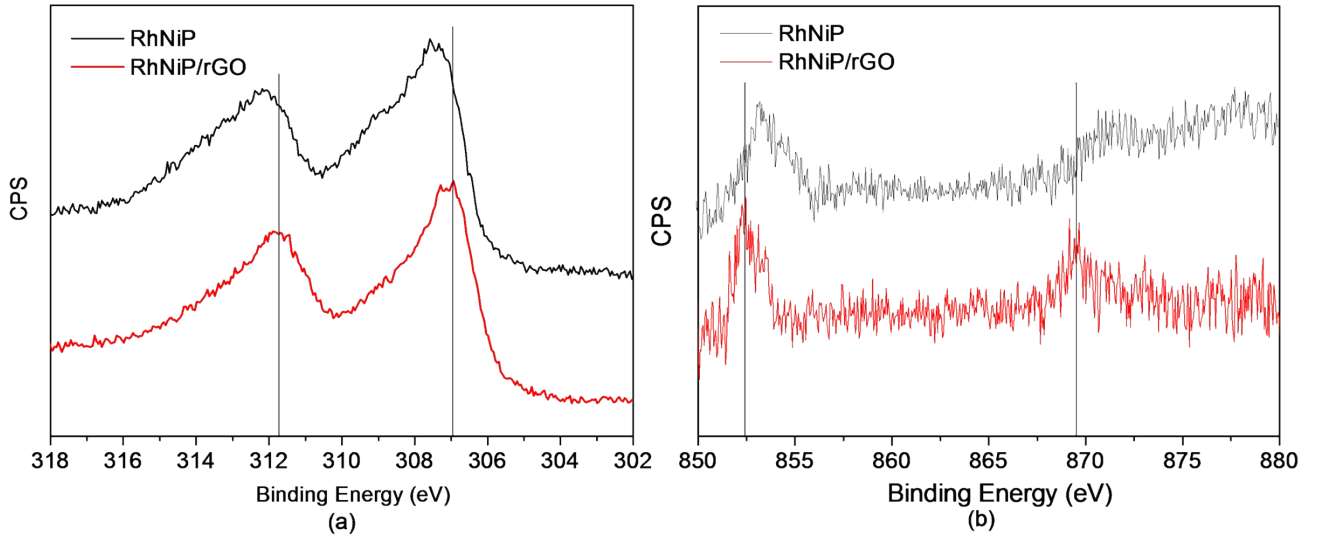

**Fig. S16** Rh 3d XPS spectra (a) and Ni 2p XPS spectra of RhNiP and RhNiP/rGO after Ar sputtering.

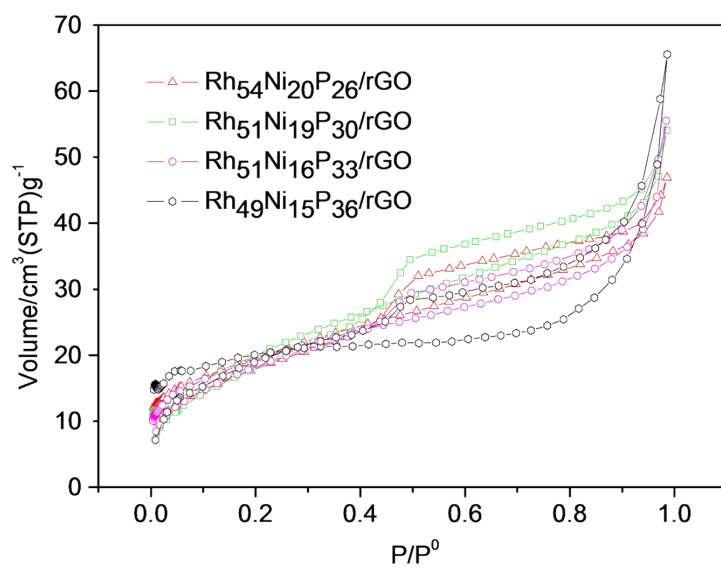

**Fig. S17** N<sub>2</sub> adsorption/desorption isotherms for the RhNiP/rGO catalysts.

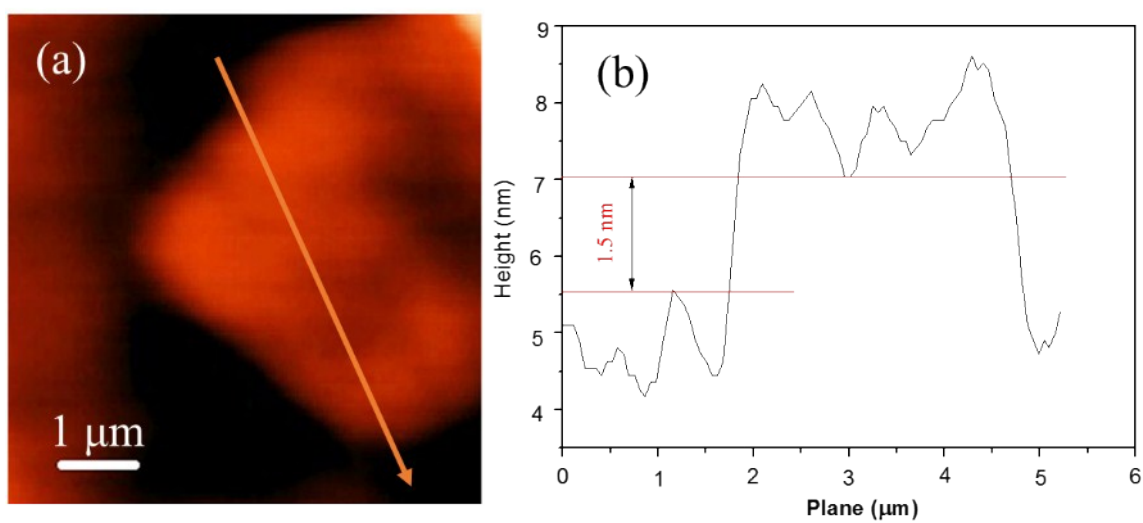

**Fig.S18** AFM image (a) and the corresponding height map (b) of GO.

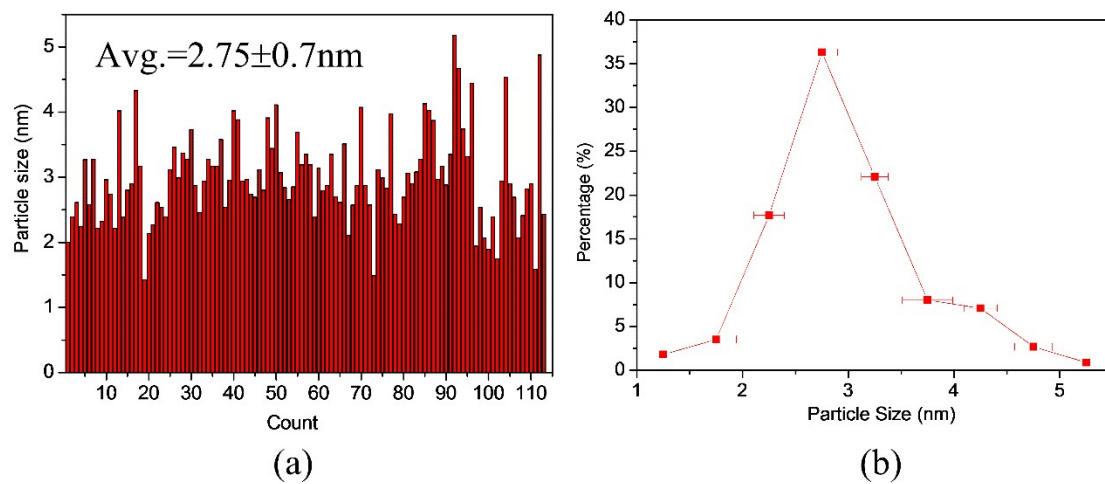

**Fig. S19** Particle distribution (a, b) of Rh<sub>51</sub>Ni<sub>19</sub>P<sub>30</sub>/rGO.

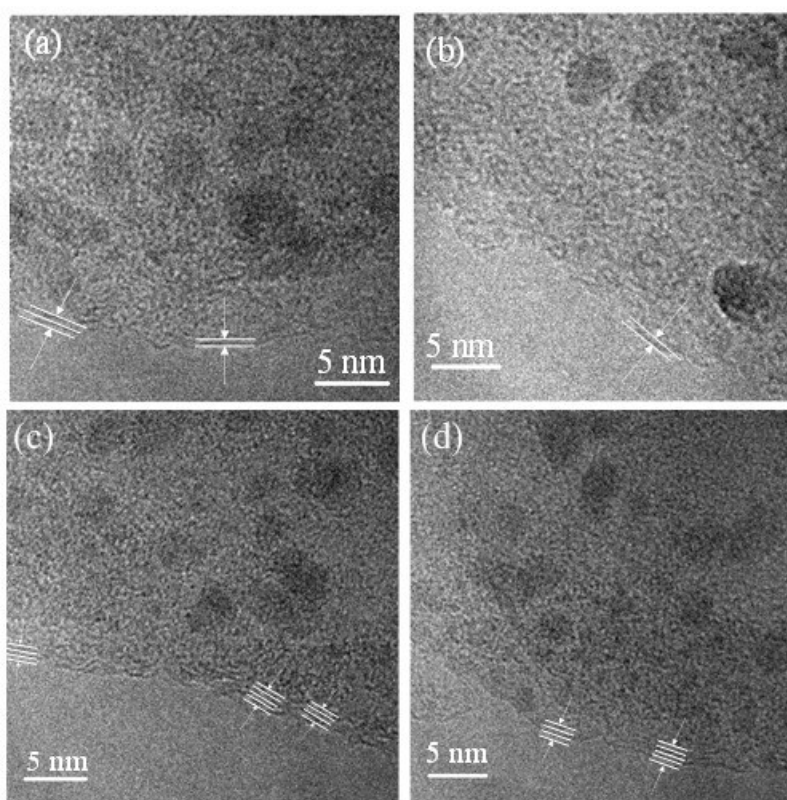

**Fig. S20** TEM image of Rh<sub>51</sub>Ni<sub>19</sub>P<sub>30</sub>/rGO (Note: transverse line represent the layer of GO).



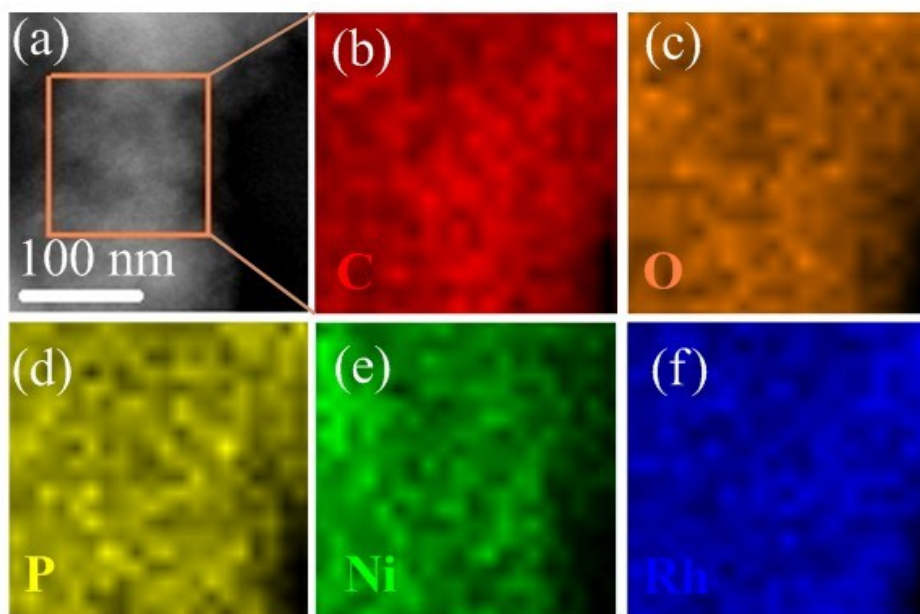

**Fig. S21** HADF-STEM and EDX mapping images of  $\text{Rh}_{51}\text{Ni}_{19}\text{P}_{30}/\text{rGO}$ .

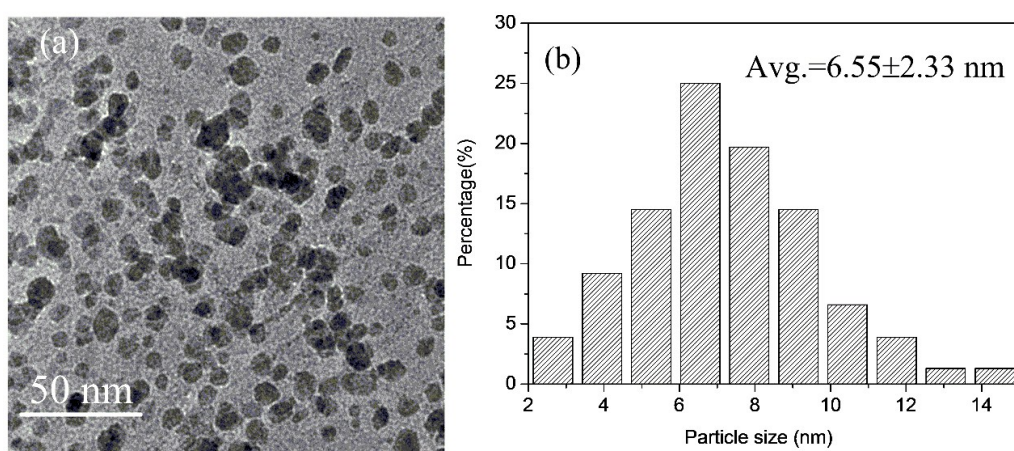

**Fig. S22** (a) TEM images and (b) particle distribution of  $\text{Rh}_{69}\text{Ni}_{31}/\text{rGO}$ .

**Table S1.** Reactant molar ratios and ICP results for the synthesis of various samples.

| Catalysts                                              | Initial molar ratios |                   |                                  | ICP results  |              |             |                     |
|--------------------------------------------------------|----------------------|-------------------|----------------------------------|--------------|--------------|-------------|---------------------|
|                                                        | RhCl <sub>3</sub>    | NiCl <sub>2</sub> | NaH <sub>2</sub> PO <sub>2</sub> | Rh<br>(wt.%) | Ni<br>(wt.%) | P<br>(wt.%) | Rh: Ni: P<br>(at.%) |
| Rh <sub>69</sub> Ni <sub>31</sub> /rGO                 | 0.08                 | 0.02              | 0                                | 24.82        | 6.47         | 0           | 69: 31: 0           |
| Rh <sub>54</sub> Ni <sub>20</sub> P <sub>26</sub> /rGO | 0.08                 | 0.02              | 0.1                              | 27.41        | 5.64         | 3.96        | 54: 20: 26          |
| Rh <sub>51</sub> Ni <sub>19</sub> P <sub>30</sub> /rGO | 0.08                 | 0.02              | 0.2                              | 24.85        | 5.37         | 4.41        | 51: 19: 30          |
| Rh <sub>51</sub> Ni <sub>16</sub> P <sub>33</sub> /rGO | 0.08                 | 0.02              | 0.3                              | 24.56        | 4.35         | 4.79        | 51: 16: 33          |
| Rh <sub>49</sub> Ni <sub>15</sub> P <sub>36</sub> /rGO | 0.08                 | 0.02              | 0.4                              | 24.89        | 4.45         | 5.51        | 49: 15: 36          |

**Table S2** Comparison of decomposition of hydrazine over different catalysts.

| Catalysts                                                  | <i>T</i> (°C) | H <sub>2</sub><br>selectivity/% | E <sub>a</sub><br>(kJ·mol <sup>-1</sup> ) | TOF <sup>a</sup><br>(h <sup>-1</sup> ) | Reference        |
|------------------------------------------------------------|---------------|---------------------------------|-------------------------------------------|----------------------------------------|------------------|
| Co-B-N-H                                                   | 20            | 100                             | 39.9                                      | 4560                                   | 1                |
| Ni <sub>2</sub> B urchins                                  | 20            | 90.0                            | 44.9                                      | 22.2                                   | 2                |
| Honeycomb-like Co-B                                        | 25            | 41.8                            | 54.3                                      | 756                                    | 3                |
| Cobalt-boron spherical                                     | 25            | 21.3                            | -                                         | 320                                    | 4                |
| Fe-B/MWCNTs                                                | 25            | 97.0                            | 46.7                                      | 4032                                   | 5                |
| <b>Rh<sub>51</sub>Ni<sub>19</sub>P<sub>30</sub>/rGO</b>    | <b>25</b>     | <b>100</b>                      | <b>58.8</b>                               | <b>101</b>                             | <b>This work</b> |
| RhNiB                                                      | 30            | 100                             | -                                         | 54.5                                   | 6                |
| Ni <sub>0.60</sub> Pd <sub>0.40</sub>                      | 50            | 82.0                            | -                                         | 3.80                                   | 7                |
| Rh <sub>10</sub> Ni <sub>90</sub>                          | 50            | 100                             | -                                         | 3.30                                   | 8                |
| Rh <sub>0.8</sub> Ni <sub>0.2</sub> @CeO <sub>x</sub> /rGO | 50            | 100                             | 58.0                                      | 211                                    | 9                |
| Rh <sub>55</sub> Ni <sub>45</sub> /Ce(OH)CO <sub>3</sub>   | 50            | 100                             | 38.8                                      | 395                                    | 10               |
| Ni@Ni-Pt/La <sub>2</sub> O <sub>3</sub>                    | 50            | 100                             | 56.2                                      | 156                                    | 11               |
| Ni <sub>66</sub> Rh <sub>34</sub> @ZIF-8                   | 50            | 100                             | 58.1                                      | 93.3                                   | 12               |
| Rh <sub>58</sub> Ni <sub>42</sub> @MIL-101                 | 50            | 100                             | 33.0                                      | 344                                    | 13               |
| Ni <sub>88</sub> Pt <sub>12</sub> @MIL-101                 | 50            | 100                             | 51.3                                      | 212                                    | 14               |
| Ni <sub>3</sub> Rh <sub>7</sub> /NPC-900                   | 50            | 100                             | -                                         | 104                                    | 15               |
| Ni <sub>3</sub> Pt <sub>7</sub> /rGO                       | 50            | 100                             | 49.4                                      | 277                                    | 16               |
| Ni <sub>0.6</sub> Fe <sub>0.4</sub> Mo                     | 50            | 100                             | 50.7                                      | 28.8                                   | 17               |



|                                                        |    |     |      |      |           |
|--------------------------------------------------------|----|-----|------|------|-----------|
| NiMoB/La(OH) <sub>3</sub>                              | 50 | 100 | 55.1 | 26.7 | 18        |
| Rh <sub>51</sub> Ni <sub>19</sub> P <sub>30</sub> /rGO | 50 | 100 | 40.4 | 471  | This work |
| NiFe                                                   | 70 | 100 | -    | 6.3  | 19        |
| Cu@Fe <sub>5</sub> Ni <sub>5</sub>                     | 70 | 100 | -    | 18.2 | 20        |

<sup>a</sup> The TOF values were calculated according to the original data provided by the reports.

**Table S3** BET surface area of RhNiP/rGO catalysts.

| Catalysts                                              | BET surface area cm <sup>2</sup> ·g <sup>-1</sup> |
|--------------------------------------------------------|---------------------------------------------------|
| Rh <sub>54</sub> Ni <sub>20</sub> P <sub>26</sub> /rGO | 70.8                                              |
| Rh <sub>51</sub> Ni <sub>19</sub> P <sub>30</sub> /rGO | 74.8                                              |
| Rh <sub>51</sub> Ni <sub>16</sub> P <sub>33</sub> /rGO | 71.0                                              |
| Rh <sub>49</sub> Ni <sub>15</sub> P <sub>36</sub> /rGO | 80.9                                              |

## Reference

- 1 F. Yang, Y.Z. Li, W. Chu, C. Li and D.G. Tong, *Catal. Sci. Technol.*, 2014, **4**, 3168.
- 2 M. Deng, S.Y. Fu, F. Yang, P. Wu and D.G. Tong, *J. Nanosci. Nanotechnol.*, 2016, **16**, 2394.
- 3 D.G. Tong, W. Chu, P. Wu and L. Zhang, *RSC Advances*, 2012, **2**, 2369.
- 4 D.G. Tong, X.L. Zeng, W. Chu, D. Wang, P. Wu, *Mater. Res. Bull.*, 2010, **45**, 442.
- 5 D.G. Tong, W. Chu, P. Wu, G.F. Gu and L. Zhang, *J. Mater. Chem. A*, 2013, **1**, 358.
- 6 J. Wang, W. Li, Y. R. Wen, L. Gu and Y. Zhang, *Adv. Energy Mater.*, 2015, **5**, 1401879.
- 7 S. K. Singh, Y. Lizuka and Q. Xu, *Int. J. Hydrogen Energy*, 2011, **36**, 11794.

- 8 A. K. Singh, M. Yadav, K. Aranishi and Q. Xu, *Int. J. Hydrogen Energy*, 2012, **37**, 18915.
- 9 Z. Zhang, Z-H. Lu, H. Tan, X. Chen and Q. Yao, *J. Mater. Chem. A*, 2015, **3**, 23520.
- 10 J. M. Chen, Q. L. Yao, J. Zhu, X. S. Chen, Z. H. Lu, *Int. J. Hydrogen Energy*, 2016, **41**, 3946.
- 11 Y.-J. Zhong, H.-B. Dai, Y.-Y. Jiang, D.-M. Chen, M. Zhu, L.-X. Sun, P. Wang, *J. Power Sources*, 2015, **300**, 294.
- 12 B. Q. Xia, N. Cao, H. M. Dai, J. Su, X. J. Wu, W. Luo, G. Z. Cheng, *ChemCatChem*, 2014, **6**, 2549.
- 13 P. P. Zhao, N. Cao, W. Luo, G. Z. Cheng, *J. Mater. Chem. A*, 2015, **3**, 12468.
- 14 N. Cao, L. Yang, H. Dai, T. Liu, J. Su, X. Wu, W. Luo, G. Cheng, *Inorg. Chem.*, 2014, **53**, 10122.
- 15 B. Q. Xia, K. Chen, W. Luo, G. Z. Cheng, *Nano Research*, 2015, **8**, 3472.
- 16 N. Cao, L. Yang, C. Du, J. Su, W. Luo, G. Cheng, *J. Mater. Chem. A*, 2014, **2**, 14344.
- 17 H.-L. Wang, J.-M. Yan, S.-J. Li, X.-W. Zhang, Q. Jiang, *J. Mater. Chem. A*, 2015, **3**, 121.
- 18 J. Zhang, Q. Kang, Z. Yang, H. Dai, D. Zhuang, P. Wang, *J. Mater. Chem. A*, 2013, **1**, 11623.
- 19 S. K. Singh, A. K. Singh, K. Aranishi, Q. Xu, *J. Am. Chem. Soc.*, 2011, **133**, 19638.
- 20 J. Wang, Y. Li, Y. Zhang, *Adv. Funct. Mater.*, 2014, **24**, 7073.
